# Supplementary material for: Carboxylic ligands to enhance material recovery from construction waste to produce CaCO3 for carbon utilization
Source: Royal Society of Chemistry journal article supplement (doi:10.1039/d4im00025k), 2024-05-03
Supplement: d4im00025k1.pdf [file d4im00025k1.pdf]

## Supplementary Information

# Carboxylic ligands to enhance material recovery from construction waste to produce $\text{CaCO}_3$ for carbon utilization

Jonah M. Williams<sup>1,2</sup>, Diandian Zhao<sup>2,3</sup>, Ning Zhang<sup>1,2</sup>, Shiho Kawashima<sup>2,3</sup>, and Aaron J. Moment<sup>4,\*</sup>

<sup>1</sup>Department of Earth and Environmental Engineering, Columbia University, New York, New York, 10027

<sup>2</sup>Lenfest Center for Sustainable Energy, Columbia University, New York, New York, 10027

<sup>3</sup>Department of Civil Engineering and Engineering Mechanics, Columbia University, New York, New York, 10027

<sup>4</sup>Department of Materials Science and Engineering, University of California Los Angeles, Los Angeles, CA, 90095

\* [ajmoment@seas.ucla.edu](mailto:ajmoment@seas.ucla.edu)

**Table S1.** Overall material balance, acid utilized, and elemental recoveries for Ca, Si, Fe, and Al for each carboxylate ligand used.

|                     | <b>mol Ca /<br/>mol<br/>organic<br/>salt</b> | <b>mol Si /<br/>mol<br/>organic<br/>salt</b> | <b>mol Fe /<br/>mol<br/>organic<br/>salt</b> | <b>mol Al /<br/>mol<br/>organic<br/>salt</b> | <b>Ca<br/>recovery<br/>(g Ca / g<br/>Ca in<br/>feedstock)</b> | <b>Si<br/>recovery<br/>(g Si / g Si<br/>in<br/>feedstock)</b> | <b>Fe recovery<br/>(g Fe / g Fe<br/>in<br/>feedstock)</b> | <b>Al recovery<br/>(g Al / g Al in<br/>feedstock)</b> |
|---------------------|----------------------------------------------|----------------------------------------------|----------------------------------------------|----------------------------------------------|---------------------------------------------------------------|---------------------------------------------------------------|-----------------------------------------------------------|-------------------------------------------------------|
| Control             | -                                            | -                                            | -                                            | -                                            | 0.704                                                         | 0.11                                                          | 0.05                                                      | 0.75                                                  |
| Sodium<br>Glutamate | 1.547                                        | 0.141                                        | 0.002                                        | 0.069                                        | 0.703                                                         | 0.14                                                          | 0.03                                                      | 0.69                                                  |
| Sodium<br>Formate   | 1.567                                        | 0.201                                        | 0.008                                        | 0.113                                        | 0.712                                                         | 0.20                                                          | 0.10                                                      | 1.00                                                  |
| Sodium<br>Acetate   | 1.580                                        | 0.205                                        | 0.008                                        | 0.108                                        | 0.718                                                         | 0.21                                                          | 0.09                                                      | 1.00                                                  |
| Sodium<br>Citrate   | 1.584                                        | 0.406                                        | 0.037                                        | 0.124                                        | 0.720                                                         | 0.40                                                          | 0.44                                                      | 1.00                                                  |

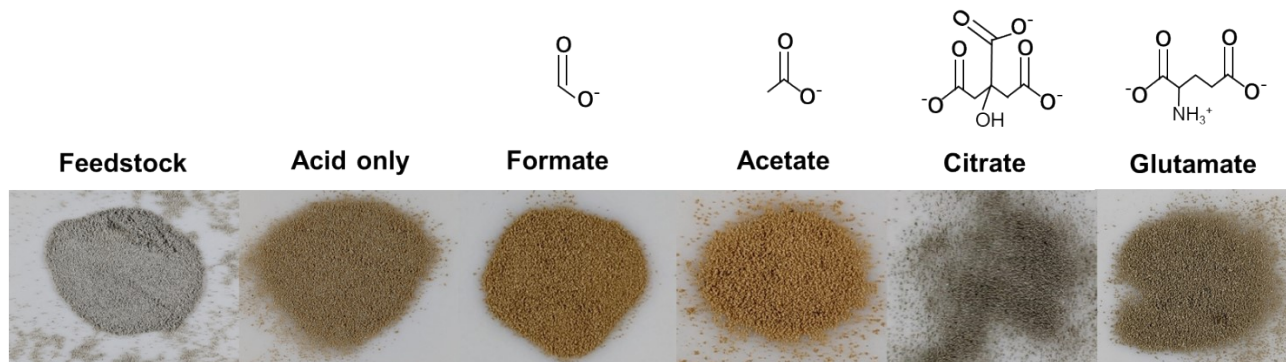

**Figure S1.** Visual images of the PERR recovered from the leaching reactor for HCl only (control), formate, acetate, citrate, and glutamate leaching cases. Images compared to the original waste hydrated cement paste (HCP) feedstock on the left.

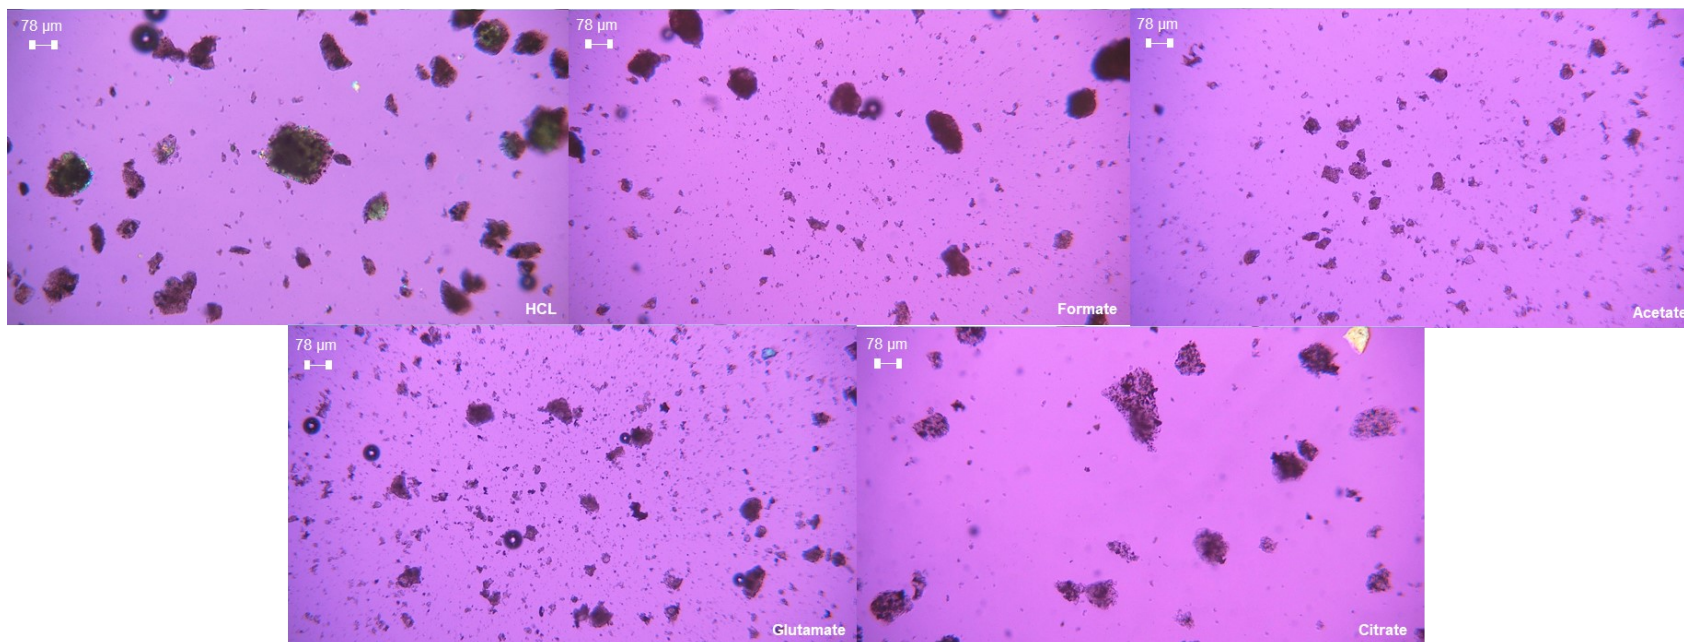

**Figure S2.** Optical microscopy at 10x showing the morphology of the post-extraction reactor residue (PERR) for the control and four ligands utilized during leaching.

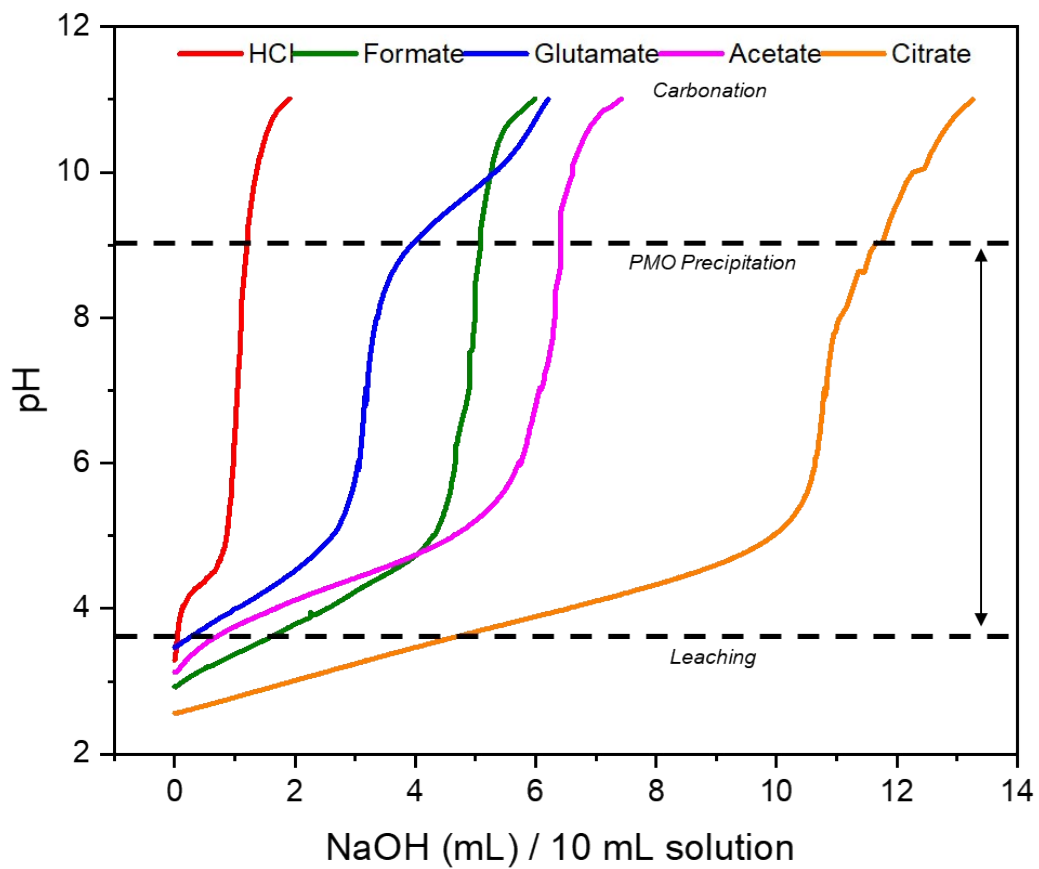

**Figure S3.** Titration curves as obtained by the auto titration unit for the five leachate solutions as their pH was raised from acidic to basic for carbonation.

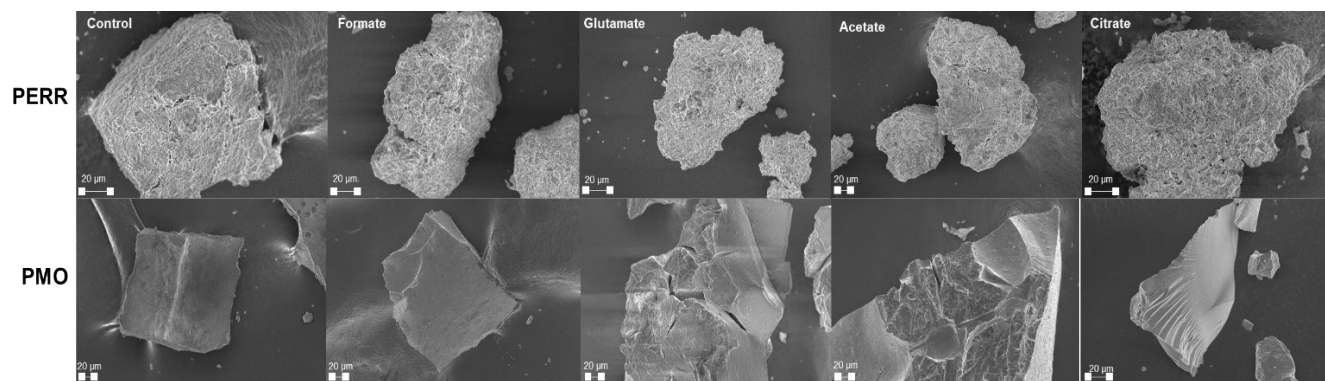

**Figure S4.** SEM images of the produced PERR and PMO showing the distinct morphologies between the two.

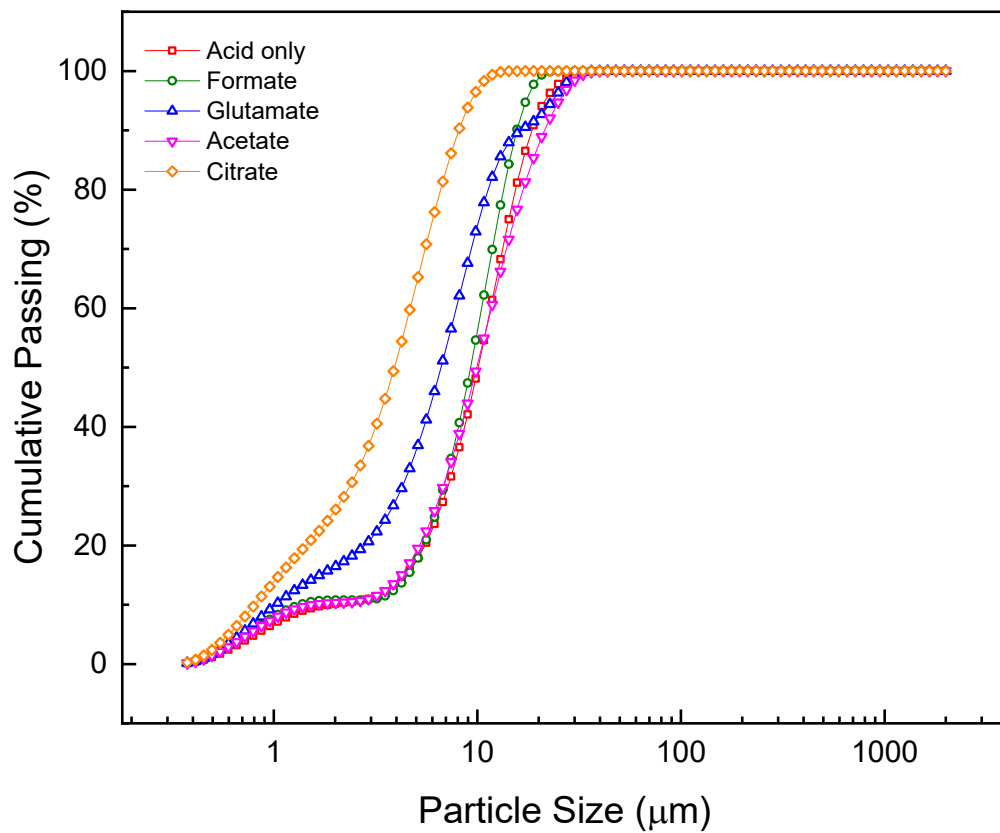

**Figure S5.** PSD data for the calcium carbonates produced from the carboxylic-assisted leaching processes displayed in cumulative passing (%).

**Table S2.** Carbonate crystalline phase as determined by Rietveld refinement and carbon balance

| <b>Case</b> | <b>Calcite (%)</b> | <b>Vaterite (%)</b> | <b>Aragonite (%)</b> | <b>Carbonate Yield (% , without PMO swing)</b> | <b>Carbonate Yield (% , with PMO swing)</b> |
|-------------|--------------------|---------------------|----------------------|------------------------------------------------|---------------------------------------------|
| HCl         | 52.7               | 47.3                | 0                    | ~100                                           | 87                                          |
| Formate     | 66.8               | 33.2                | 0                    | ~100                                           | 62                                          |
| Acetate     | 90.1               | 9.9                 | 0                    | ~100                                           | 58                                          |
| Glutamate   | 6.0                | 94.0                | 0                    | ~100                                           | 57                                          |
| Citrate     | 17.8               | 82.2                | 0                    | 96                                             | 42                                          |



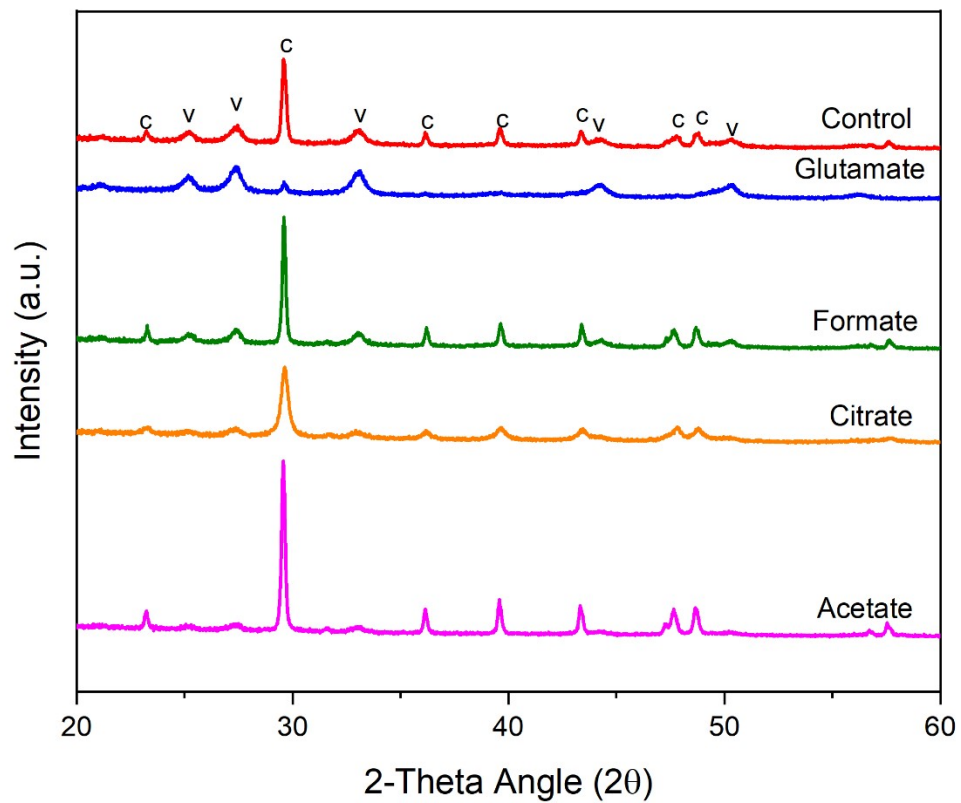

**Figure S6.** P-XRD data for the produced calcium carbonate samples. C indicates major calcite peaks while v indicated major vaterite peaks. No aragonite was detected at the crystallization conditions utilized.
